# Supplementary material for: Sb3+/Mn2+ co-doped lead-free Cs2KYCl6 perovskites for white light-emitting diodes
Source: Royal Society of Chemistry journal article supplement (doi:10.1039/d4tc00341a), 2024-01-01
Supplement: d4tc00341a1.pdf [file d4tc00341a1.pdf]

## Sb<sup>3+</sup>/Mn<sup>2+</sup> co-doped lead-free Cs<sub>2</sub>KYCl<sub>6</sub> perovskites for white light-emitting diodes

Muhammad<sup>a</sup>, Zengce Liu<sup>a</sup>, Junchun Li<sup>a</sup>, Yuanyuan Sheng<sup>a</sup>, Yajing Chang<sup>b</sup>, Ping Chen<sup>a,c\*</sup>, and Yang Jiang<sup>a\*</sup>

- School of Materials Science and Engineering, Hefei University of Technology, Hefei, 230009, China
- State Key Laboratory of Pulsed Power Laser Technology, National University of Defense Technology, Hefei, 230037, China
- The State Key Laboratory of Refractories and Metallurgy, Wuhan University of Science and Technology, Wuhan, 430081, China

\* Corresponding Authors

Yang Jiang, Chen Ping

E-mail: apjiang@hfut.edu.cn ; chenp@hfut.edu.cn

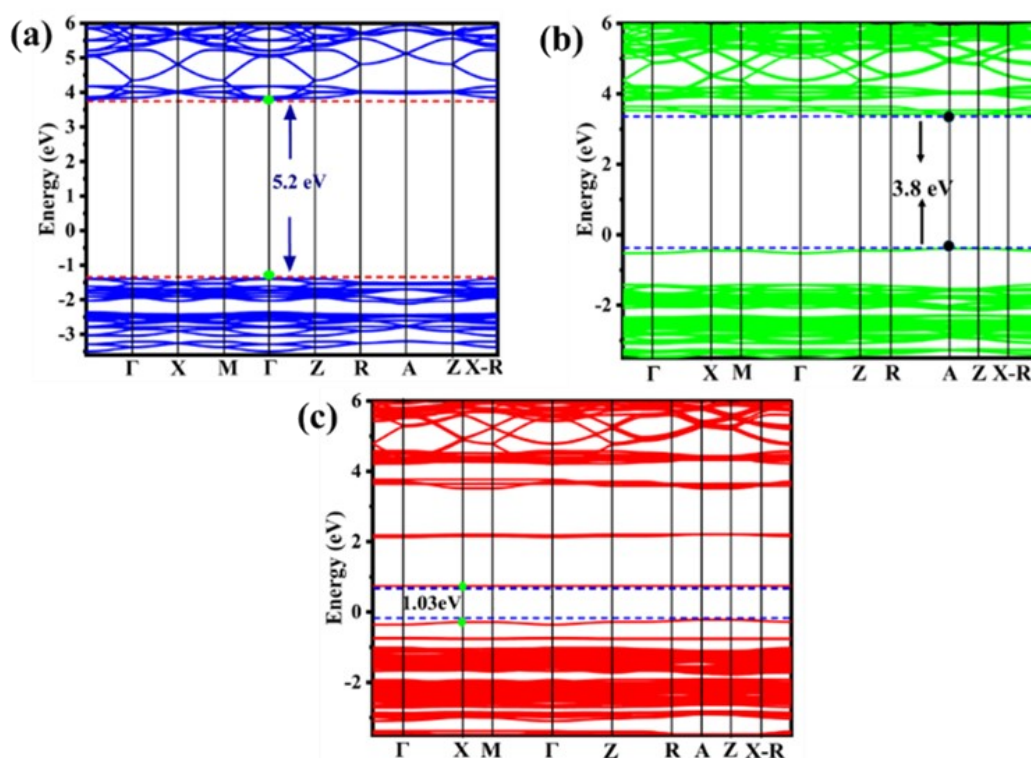

**Fig.S1** Calculated band gaps for (a) Pristine Cs<sub>2</sub>KYCl<sub>6</sub> MCs (b) Sb<sup>3+</sup>-doped Cs<sub>2</sub>KYCl<sub>6</sub> (c) and Sb<sup>3+</sup>/Mn<sup>2+</sup> co-doped Cs<sub>2</sub>KYCl<sub>6</sub> MCs.

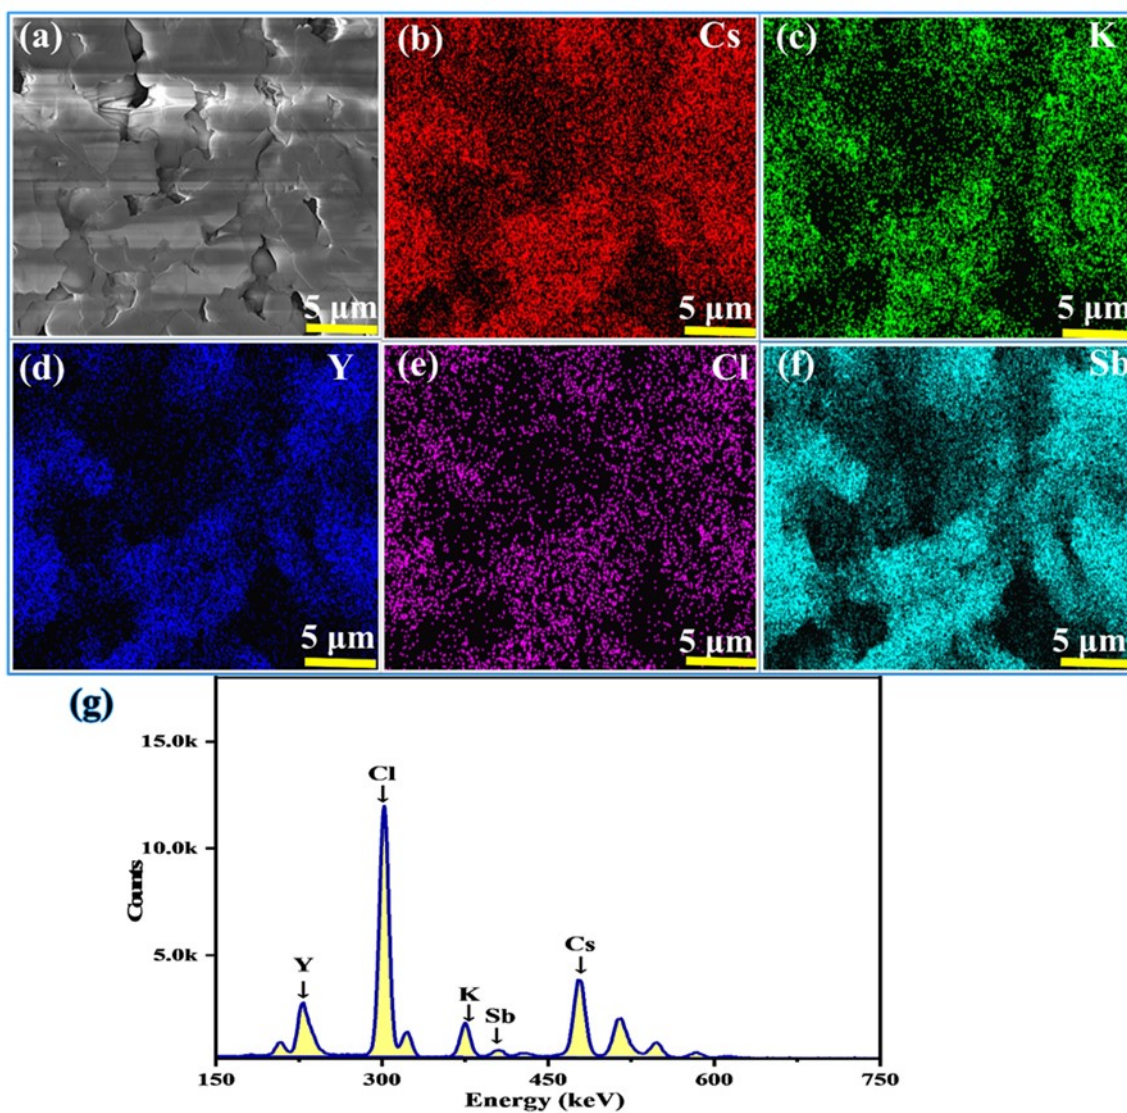

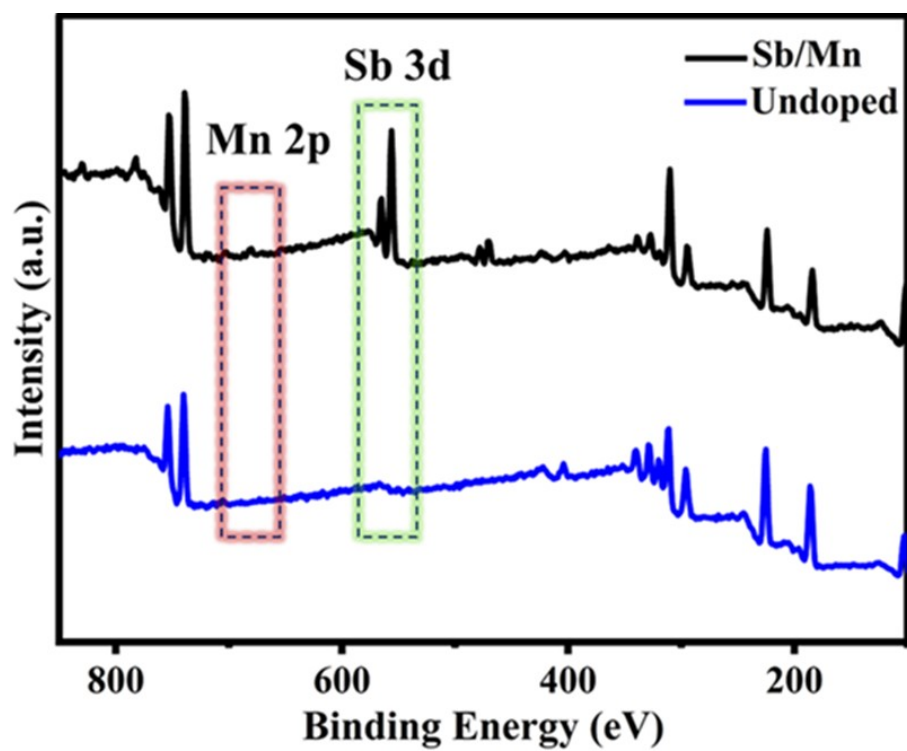

**Fig. S3** (a) XPS survey spectra of pristine and  $\text{Sb}^{3+}/\text{Mn}^{2+}$  co-doped  $\text{C}_2\text{KYCl}_6$  MCs.

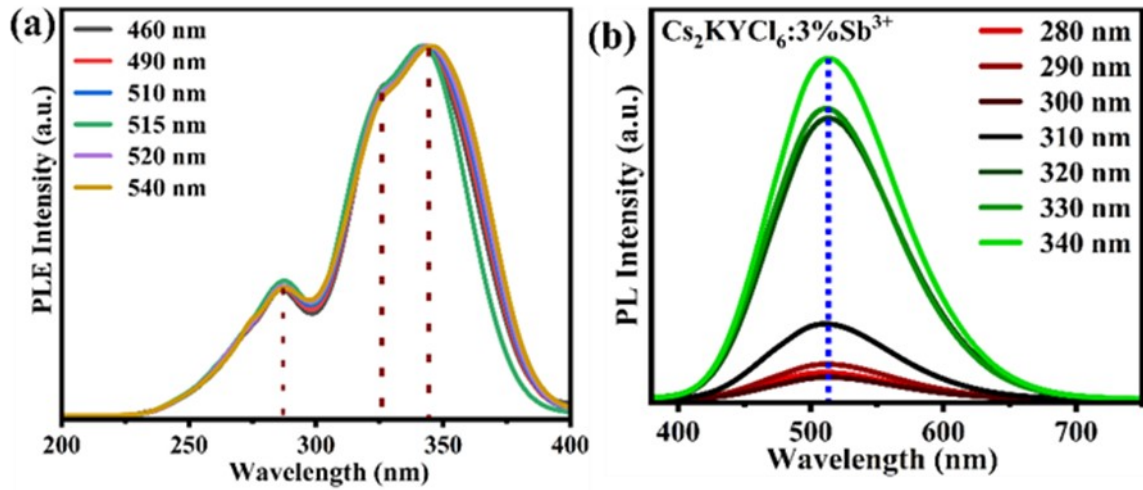

**Fig. S4** (a) Normalized PLE spectra of 3%  $\text{Sb}^{3+}$  single-doped  $\text{Cs}_2\text{KYCl}_6$  under different emission wavelengths (460 nm, 490 nm, 510 nm, 515 nm, 520 nm, and 540 nm). (b) PL spectra of  $\text{Cs}_2\text{KYCl}_6:3\% \text{Sb}^{3+}$ .

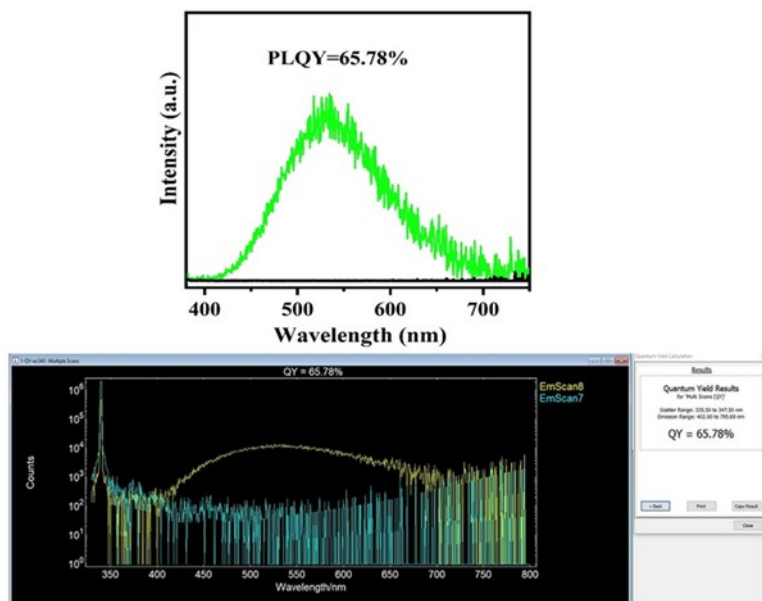

Fig. S5 PLQY of 3% Sb<sup>3+</sup> single-doped Cs<sub>2</sub>KYCl<sub>6</sub> MCs.

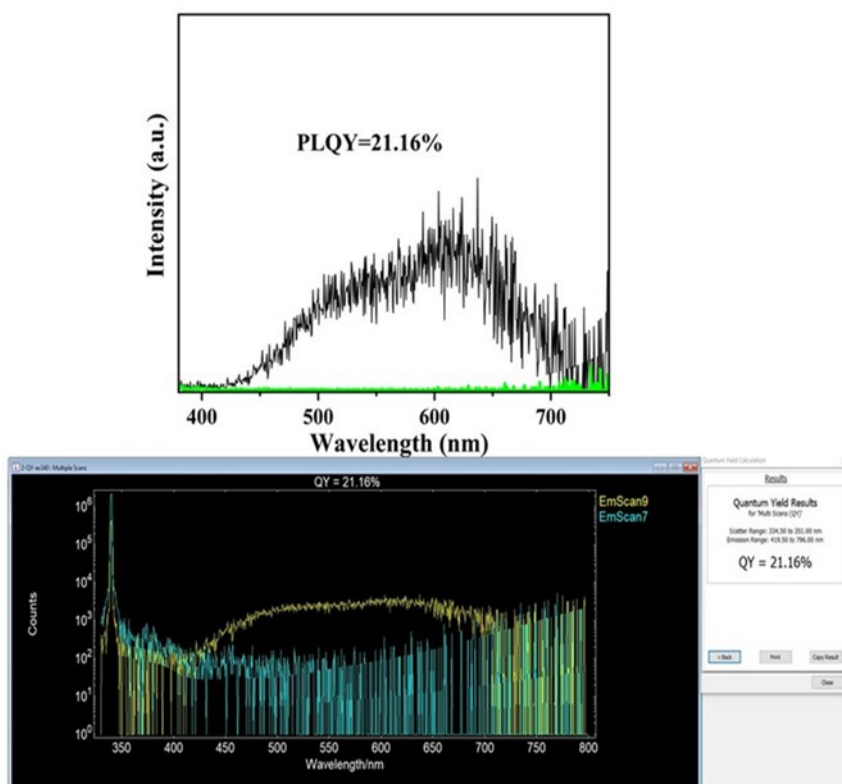

Fig. S6 PLQY spectra of 3% Sb<sup>3+</sup>/3.5% Mn<sup>2+</sup> co-doped Cs<sub>2</sub>KYCl<sub>6</sub> MCs.

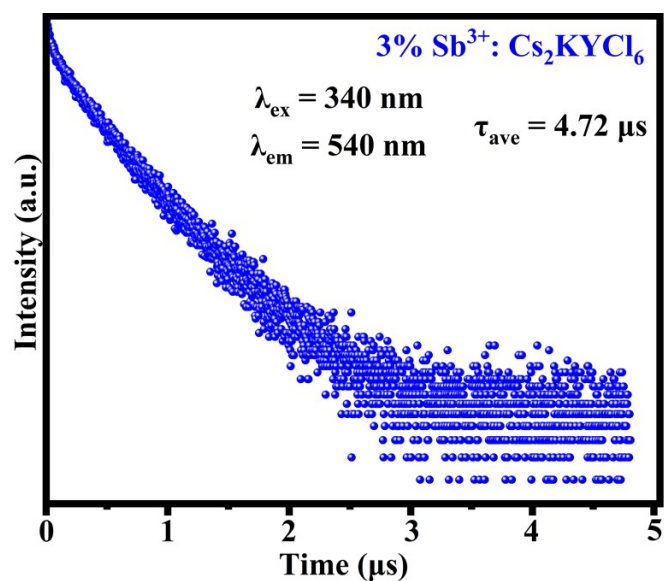

Fig. S7 Time-resolved PL spectra of 3% Sb<sup>3+</sup> single-doped Cs<sub>2</sub>KYCl<sub>6</sub> MCs excited at 340 nm.

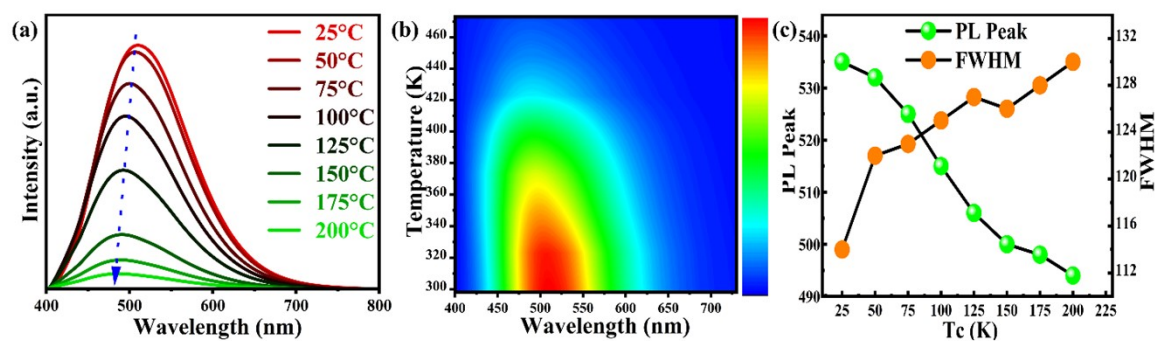

Fig. S8 (a) Temperature-dependent PL of Sb<sup>3+</sup> single-doped MCs excited at 340 nm. (b) 2D color map of Sb<sup>3+</sup> single-doped MCs. (c) PL peak positions and FWHM at corresponding temperatures.

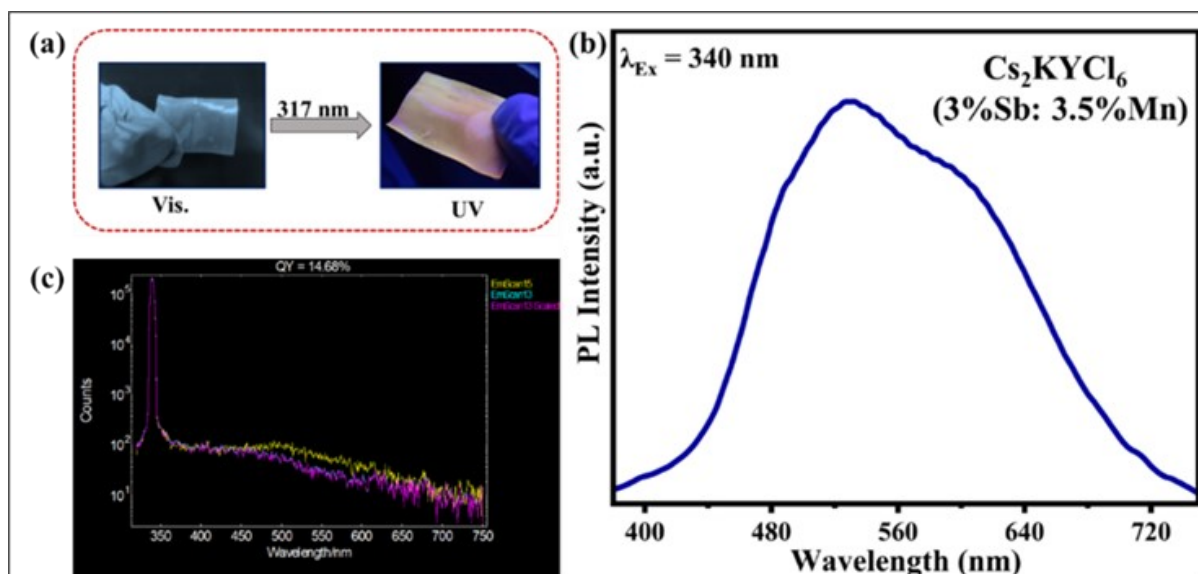

**Fig.S9** (a) Thin film of optimal Sb<sup>3+</sup>/Mn<sup>2+</sup> co-doped MCs under 317 nm UV radiation (b) PL spectra (c) and PLQY.

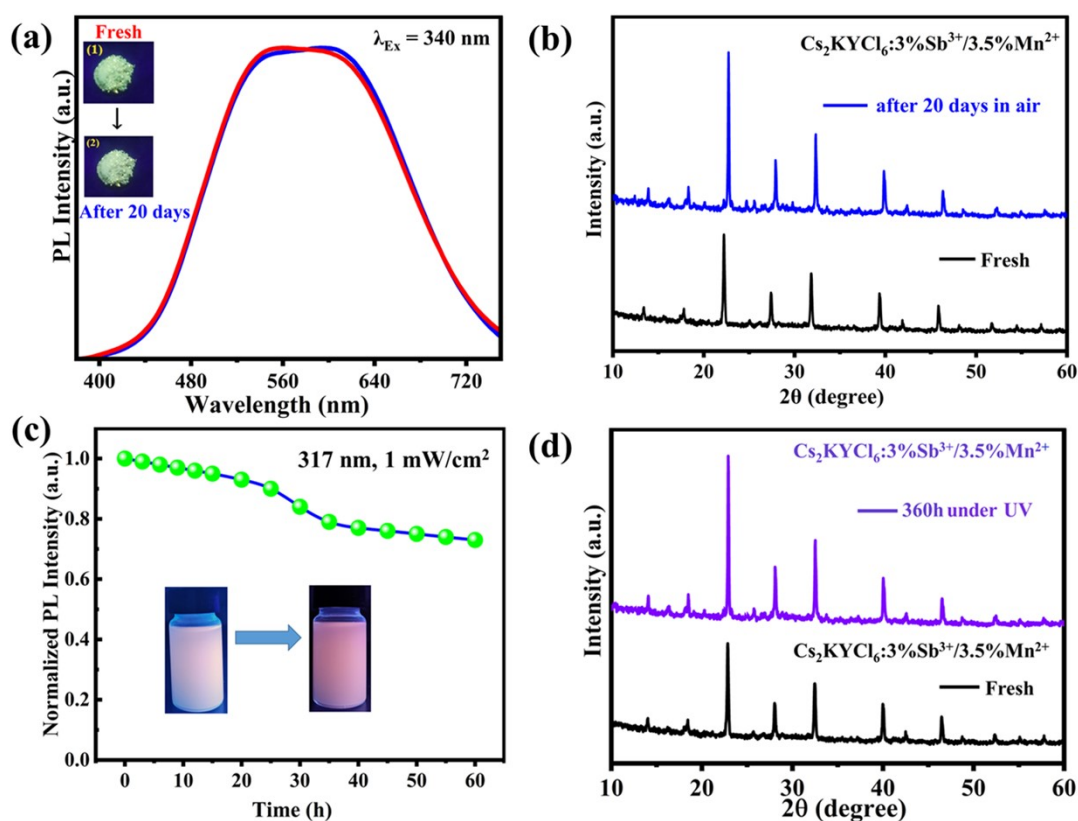

**Fig.S10** (a) PL spectra of Sb<sup>3+</sup>/Mn<sup>2+</sup> co-doped Cs<sub>2</sub>KYCl<sub>6</sub> (fresh and after exposure in the air for 20 days) and (b) XRD after 20 days exposure in the air (c) Normalized PL intensities under continuous light irradiation for 60 h and the insets are photos of pre-and post-test. (d) XRD patterns of the fresh and consecutive 360 h exposure to UV light illumination.

| Sites            | Formation Energy (eV)<br>Sb <sup>3+</sup> Defects | Formation Energy (eV)<br>Mn <sup>2+</sup> Defects |
|------------------|---------------------------------------------------|---------------------------------------------------|
| Cs <sup>3+</sup> | 8.929178 eV                                       | -4.9865 eV                                        |
| K <sup>+</sup>   | 8.929178 eV                                       | 5.015505 eV                                       |
| Y <sup>3+</sup>  | - 8.931178 eV                                     | -11.6613 eV                                       |
| Cl <sup>-</sup>  | 23.87503 eV                                       | 90.10 eV                                          |
| Interstitial     | 18.44202 eV                                       | 68.92 eV                                          |

**Table. S1** Formation energies of Sb<sup>3+</sup> and Mn<sup>2+</sup> defects in Cs<sub>2</sub>KYCl<sub>6</sub>

| Elements   | Cs    | K    | Y     | Cl    | Sb   | Atomic percentages of |
|------------|-------|------|-------|-------|------|-----------------------|
| Atomic (%) | 21.33 | 8.52 | 10.08 | 59.50 | 0.56 |                       |

**Table. S2**

3% Sb<sup>3+</sup> single-doped Cs<sub>2</sub>KYCl<sub>6</sub> MCs

**Table. S3** Atomic percentages of 3% Sb<sup>3+</sup> and 3.5% Mn<sup>2+</sup> co-doped Cs<sub>2</sub>KYCl<sub>6</sub> MCs.

| Elements   | Cs    | K    | Y    | Cl    | Sb   | Mn   |
|------------|-------|------|------|-------|------|------|
| Atomic (%) | 20.42 | 4.64 | 8.06 | 57.65 | 2.41 | 6.82 |

**Table. S4** The average lifetime of 3% Sb<sup>3+</sup> single-doped Cs<sub>2</sub>KYCl<sub>6</sub> MCs at 540 nm excited under 340 nm



| $t_1$ ( $\mu\text{s}$ ) | $t_2$ ( $\mu\text{s}$ ) | A1      | A2      | $\tau_{\text{ave}}$ ( $\mu\text{s}$ ) |
|-------------------------|-------------------------|---------|---------|---------------------------------------|
| 0.42                    | 4.91                    | 408.166 | 760.191 | 4.72                                  |

**Table. S5** The average lifetime of 3%  $\text{Sb}^{3+}$  and 3.5%  $\text{Mn}^{2+}$  co-doped  $\text{Cs}_2\text{KYCl}_6$  MCs monitored at 540 nm and 590 nm.

| Emission (nm) | $t_1$ ( $\mu\text{s}$ ) | $t_2$ ( $\mu\text{s}$ ) | A1     | A2     | $\tau_{\text{ave}}$ ( $\mu\text{s}$ ) |
|---------------|-------------------------|-------------------------|--------|--------|---------------------------------------|
| 540           | 0.296                   | 4.53                    | 477.13 | 548.16 | 4.30                                  |
| 590           | 0.383                   | 4.929                   | 427.39 | 382.93 | 4.57                                  |

| Components                                                                            | CIE          | CRI  | CCT  | Ref              |
|---------------------------------------------------------------------------------------|--------------|------|------|------------------|
| $\text{Cs}_2\text{NaYCl}_6: 3\%\text{Sb}^{3+}/4\%\text{Mn}^{2+}$                      | (0.34, 0.31) | 81.2 | 5410 | 1                |
| $\text{Cs}_2\text{SnCl}_6:0.59\%\text{Sb}^{3+}$                                       | (0.30, 0.37) | 81   | 6815 | 2                |
| $\text{Cs}_2\text{Ag}_{0.4}\text{Na}_{0.6}\text{InCl}_6:\text{Bi}_3^+/\text{Gd}^{3+}$ | (0.34, 0.33) | 93.9 | 4818 | 3                |
| $\text{Cs}_2\text{NaYCl}_6:1\%\text{Sb}^{3+}(\text{Eu}^{3+}/\text{Tb}^{3+})$          | (0.32, 0.33) | 80.3 | /    | 4                |
| $\text{Cs}_2\text{AgIn}_{0.9}\text{Bi}_{0.1}\text{Cl}_6$                              | (0.32, 0.32) | 94.5 | 6432 | 5                |
| $\text{MA}_4\text{In}_{0.9}\text{Sb}_{0.1}\text{Cl}_7$                                | (0.39, 0.36) | 91   | 3483 | 6                |
| $\text{Cs}_2\text{KYCl}_6:3\%\text{Sb}^{3+}/3.5\%\text{Mn}^{2+}$                      | (0.34, 0.41) | 85.4 | 5062 | <b>This work</b> |

**Table. S6.** Typical optical features of different lead-free halides WLEDs.

## References

1. S. Bai, H. Liang, C. Li, C. Tang, G. Yang, X. Xu, X. Yang, G. Pan and Y. Zhu, *Ceramics International*, 2023, **49**, 1102-1107.
2. J. Li, Z. Tan, M. Hu, C. Chen, J. Luo, S. Li, L. Gao, Z. Xiao, G. Niu and J. Tang, *Frontiers of Optoelectronics*, 2019, **12**, 352-364.
3. C.-Y. Wang, P. Liang, R.-J. Xie, Y. Yao, P. Liu, Y. Yang, J. Hu, L. Shao, X. W. Sun, F. Kang and G. Wei, *Chemistry of Materials*, 2020, **32**, 7814-7821.
4. Y. Wang, S. Bai, H. Liang, C. Li, T. Tan, G. Yang and J. Wang, *Journal of Alloys and Compounds*, 2023, **934**, 167952.
5. Y. Zhang, Z. Zhang, W. Yu, Y. He, Z. Chen, L. Xiao, J.-j. Shi, X. Guo, S. Wang and B. Qu, *Advance Science*, 2022, **9**, 2102895.
6. D. Liang, X. Liu, B. Luo, Q. Qian, W. Cai, S. Zhao, J. Chen and Z. Zang, *EcoMat*, 2023, **5**, e12296.
